# Supplementary material
Source: MDPI journal article supplement (https://www.mdpi.com/2673-1592/5/3/49)
Supplement: s1 [file s1]

Archive with 2 entries (2 files):
- prosthesis-2496906 resub proofread supplementary 1.pdf
- prosthesis-2496906 resub proofread supplementary 2.xlsx
