# Supplementary material
Source: MDPI journal article supplement (https://www.mdpi.com/2673-1592/5/3/49)
Supplement: s1 [file s1 › prosthesis-2496906 resub proofread supplementary 2.xlsx]

## Sheet: Sheet1
					.
		1 = MIS		1 = Traction table	.
		2 = SuperPATH		2 = Supine	.		Mean	SD	Male	Median	SD		SD
		3 = conventional	N	3 = Lateral decubitus	N		Years		N	kg/m²		0 - 100 points
STUDY	Year	ZUGNANG	Cement	Table	PATIENTS	HIPS	AGE	AGE	GENDER	BMI	BMI	HHS preoperative	HHS preoperative	Osteoarthrosis	Fracture	Dysplasia	ANFH	Hb 1 day	Hb 1 day SD	Hb 2 days	Hb 2 days SD	Hb days 3	Hb 3 days SD	Hb 4 days	Hb 4 days SD	CRP 1 day	CRP 1 day SD	CRP 2 days	CRP 2 days SD	CRP 3 days	CRP 3 days SD	CRP 4 days	CRP 4 days SD	CK before	CK before SD	CK 1 day	CK 1 day SD	CK 2 days	CK 2 days SD	CK days 3	CK 3 days SD	CK 4 days	CK 4 days SD	BEMERKUNG
De Anta-Diaz B et al.	2016	1	8	?	49	49	64.8	10.1	26	26.6	3.9	44.4	13.6	49	0		0											11.4	5.2			7.1	3.5					203.2	53.7			105	54.1
		3	6	?	50	50	63.5	12.5	26	26.9	3.1	42.9	15.2	50	0		0											14.4	9.1			10.1	5.2					387	174			189.8	71.3
Dienstknecht T et al.	2013	1	2	3	42	42	61	13	14	26.1	3	48	15	42	0		0	11.2	1.7	10.5	1.6							142	56															Teilung nach BMI
		3	1		36	36	62	13	12	24.3	3.6	46	16	36	0		0	11.6	1.6	11.3	1.7							118	53
		1	3	3	41	41	61	11	24	34.3	4.4	44	15	41	0		0	11.7	1.4	11.2	1.6							149	62
		3	0		15	15	61	10	10	34.6	4.1	46	16	15	0		0	12	1.4	11.4	1.3							178	115
Khan RJK et al.	2012	1	44	3	44	44	72.3	1	24	28.5	0.7			42	0	0	2	10.37	1.9									98.2	53.5
		3	45	3	45	45	72.8	1.1	19	28.9	0.6			43	0	0	2	10.14	1.63									92	47.25
Landgraeber S et al.	2013	1	36	3	36	36	70.26	4.05	12	27.03	2.82			36	0	0	0	11.38	1.48	11.25	1.35					9.94	0.49	17.15	6.81					94.84	49.81	521.93	211.02
		3	40	2	40	40	71.03	5.38	14	26.76	3.83			40	0	0	0	11.33	1.46	10.8	1.47					12.43	4.18	21.07	5.47					120.46	115.66	469.64	217.6
Li X et al.	2021	2		3	49	49	75.53	7.34	27	22.99	2.87			0	15		34													42.03	8.54			92.93	50.28					526.98	117.24
		3		3	47	47	77.21	7.84	24	22.7	3			0	16		31													64.15	12.92			104.84	46.47					865.82	192.72
Li L	2020	2		3	30	30	70.35	4.26	16			25.41	2.41
		3		3	30	30	70.12	4.78	18			26.35	2.47
Martin R et al.	2011	1	42	3	42	42	66.7	10.1	12	30.6	6.1	37.4	15.5	37	0		5			10.4	1.5							14.2	7.4
		3	41		41	41	63.1	10.2	14	29.4	5.5	40.2	12.9	37	0		4			9.6	1.5							13.8	5.7
Mjaaland KE et al.	2015	1	83	2	83	83	67.2	8.6	25	27.7	3.6	53.6	13.7	83	0		0	11.1	1.2	10.9	1.3	10.9	1.2	11	1.3	19.4	14.8	47.5	39.3	48.4	39.3	33.4	25.6	111.5	61.5	688.2	335	989.5	446.7	1113.1	479.8	1013.4	458	Gleiches Patientenkollektiv
		3	80	3	80	80	65.6	8.6	30	27.6	3.9	56	11.2	80	0		0	11.6	1.3	11.3	1.2	11.4	1.3	11.6	1.4	22.4	17.7	50	41.5	51.6	39.6	36.5	25.4	114.9	55.7	677.2	281.1	965.8	467.8	971.7	486.3	820.1	395.9
Nistor DV et al.	2017	1	0	2	35	35	67	4.75	26	27.45	3.76			35	0	0	0																	59	7	333	59.75	469	83	352	51.25	253	48.63
		3	0	2	35	35	64	3.25	16	28.63	3.12			35	0	0	0																	59	6.25	364	50.25	357	56.25	275	58.13	210	62
Ouyang C et al.	2018	2		3	12	12	54	6.5	8	23.1	2.3	45.67	5.93	5	0	0	7	12.63	1.39			10.73	1.87			51.01	27.38			63.27	49.43			123.25	124.45	598	476.52			661.75	261.01
		3		3	12	12	55	5	9	23.9	3.38	46.92	8.94	6	0	0	6	12.28	0.5			10.43	0.63			67.79	22.44			87.55	38.94			124.83	42.61	1176.42	762.98			1035.25	540.62
Rykov K et al.	2017	1	23	2	23	23	62.8	6.1	8	29	5.6	52	6.67	23	0		0									19.7	17.55							111.96	76.4	490.3	159.85
		3	23	3	23	23	60.2	8.1	11	29.3	4.8	51	8.95	23	0		0									11.39	13.38							111.44	76.21	550.96	169.44
Varela-Egocheaga JR et al.	2013	1	0		25	25	64.8	10.45	12	28.27	3.67	52.7	12.92	21	0	0	4	10.68	1.42	9.56	1.25
		3	0		25	25	63.8	9.65	12	27.78	3.24	51.3	14.94	22	0	0	3	11.1	1.93	9.65	1.38
Xiao C et al.	2021	1	0	3	49	49	71.06	10.87	16	26.73	4.18			0	49	0	0	9.88	1.04			9.25	0.89			59.51	26.28			97.21	39.27			79.25	13.01	476.67	87.44			370.23	249.37
		3	0	3	57	57	73.93	10.02	26	26.39	4.64			0	57	0	0	9.41	0.94			8.91	0.15			69.7	2.95			113.29	4.98			77.53	27.53	613.77	25.35			504.62	21.88
